# Supplementary material for: Promotion Effects of miR-375 on the Osteogenic Differentiation of Human Adipose-Derived Mesenchymal Stem Cells
Source: PubMed Central journal article supplement — Stem Cell Reports. 2017 Mar 2;8(3):773–86. doi: 10.1016/j.stemcr.2017.01.028 (PMC5355733; doi:10.1016/j.stemcr.2017.01.028), 2017-03-02
Supplement: mmc1.pdf [file mmc1.pdf]

**Stem Cell Reports, Volume 8**

**Supplemental Information**

**Promotion Effects of miR-375 on the Osteogenic Differentiation of Human Adipose-Derived Mesenchymal Stem Cells**

**Si Chen, Yunfei Zheng, Shan Zhang, Lingfei Jia, and Yongsheng Zhou**

Supplemental Figures:

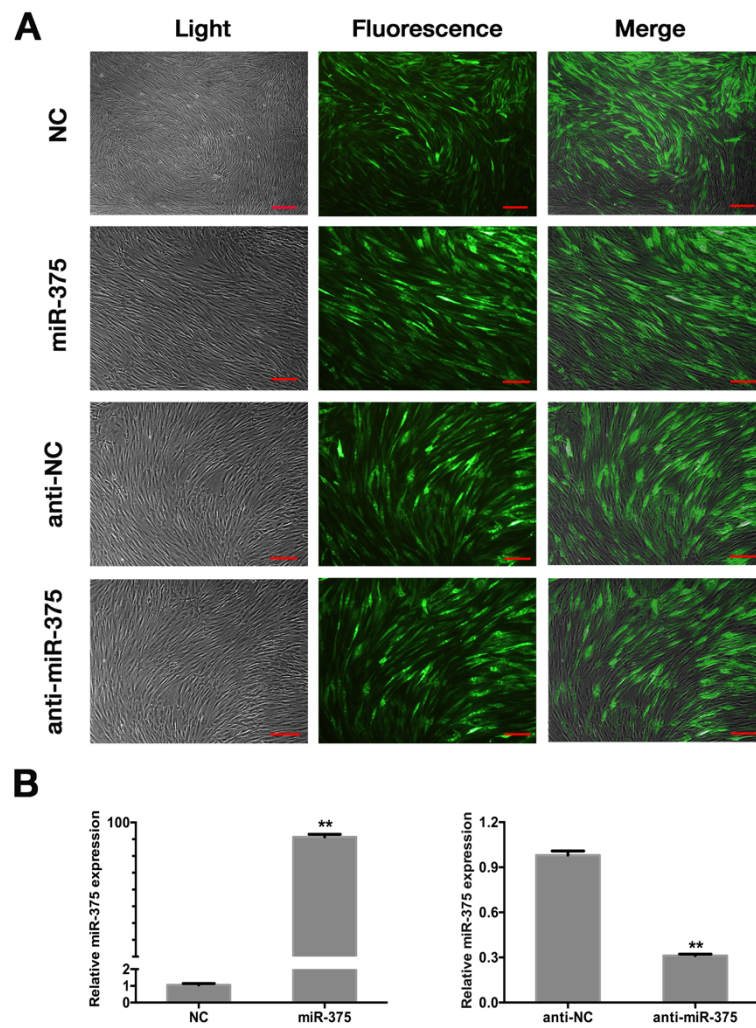

Figure S1 (related to main figure 2). Transduction efficiency of lentivirus containing miR-375, anti-miR-375, or control vectors. (A) Micrographs of GFP-positive hASCs under ordinary and fluorescent light. Scale bars: 500  $\mu$ m. (B) Left: relative miR-375 expression in miR-375 and NC groups as determined by qRT-PCR. Right: relative miR-375 expression in anti-miR-375 and anti-NC groups as determined by qRT-PCR. U6 was used for normalization. Data are represented as mean  $\pm$  SD; \* $p < 0.05$ , \*\* $p < 0.01$  ( $n = 3$  independent experiments).

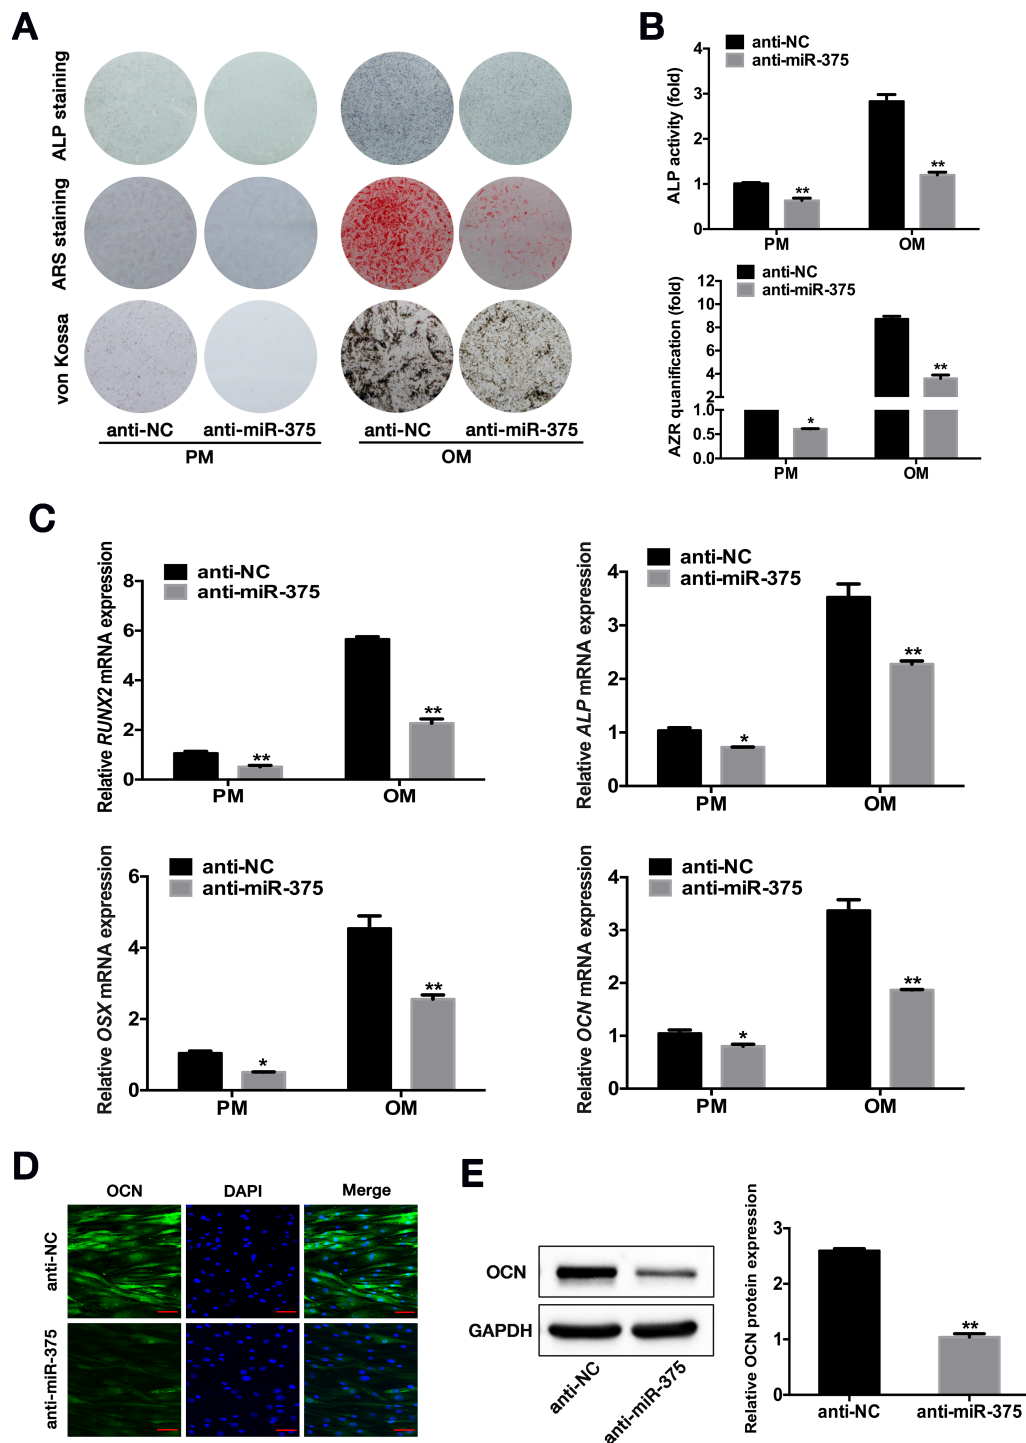

Figure S2 (related to main figure 2). miR-375 knockdown inhibits the osteogenic differentiation of hASCs. hASCs were transfected with lentivirus expressing anti-miR-375 or control vector (anti-NC), and cultured in proliferation medium (PM) or osteogenic medium (OM). (A) Alkaline phosphatase (ALP) staining on day 7, Alizarin Red S (ARS) staining on day 14, and von Kossa (VK) staining on day 21 after osteogenic induction. (B) ALP activity on day 7 and ARS mineralization assay on day 14 after osteogenic induction. (C) Relative mRNA levels of *RUNX2* and *ALP* measured by qRT-PCR on day 7 of osteogenic induction. Relative mRNA levels of *OSX* and *OCN* measured by qRT-PCR on day 14 of osteogenic induction. *GAPDH* was used for normalization. (D) Confocal microscopy of OCN with DAPI counterstaining on day 14 after osteogenic induction. Scale bars:

200  $\mu$ m. (E) Left: western blot of OCN protein level on day 14 after osteogenic induction. GAPDH was used as the internal control. Right: quantification of band intensities. Data are represented as mean  $\pm$  SD; \* $p < 0.05$ , \*\* $p < 0.01$  ( $n = 3$  independent experiments).

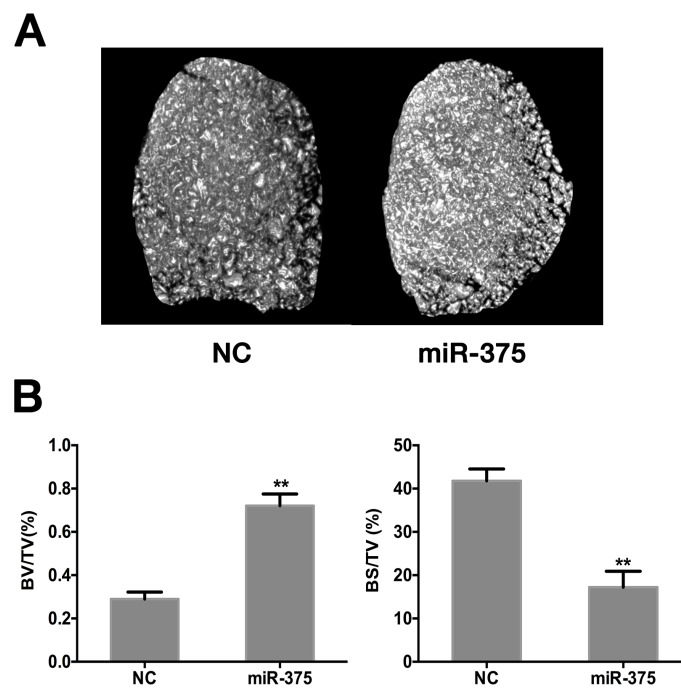

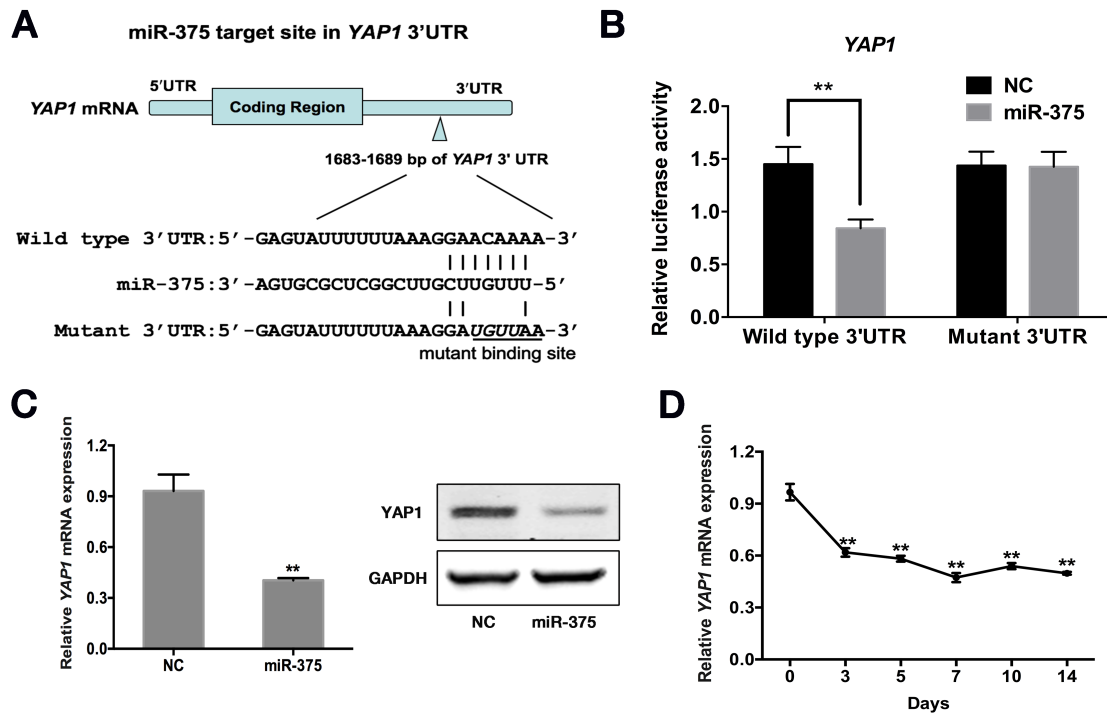

1) Figure S4 (related to main figure 7). miR-375 suppresses *YAP1* via directly targeting its 3'UTR. (A) Binding site of miR-375 in the 3'UTR of *YAP1*-WT mRNA (mutated bases in the 3'UTR of *YAP1*-MT are underlined). (B) Luciferase activity of cells with miR-375 overexpression in the *YAP1*-WT or *YAP1*-MT groups. (C) Relative mRNA and protein levels of *YAP1* in miR-375 and NC groups as determined by qRT-PCR and western blot. *GAPDH* was used for normalization and the internal control. (D) Relative mRNA levels of *YAP1* at various time points during the osteogenic differentiation of hASCs as determined by qRT-PCR. *GAPDH* was used for normalization. Data are represented as mean  $\pm$  SD; \* $p < 0.05$ , \*\* $p < 0.01$  ( $n = 3$  independent experiments).

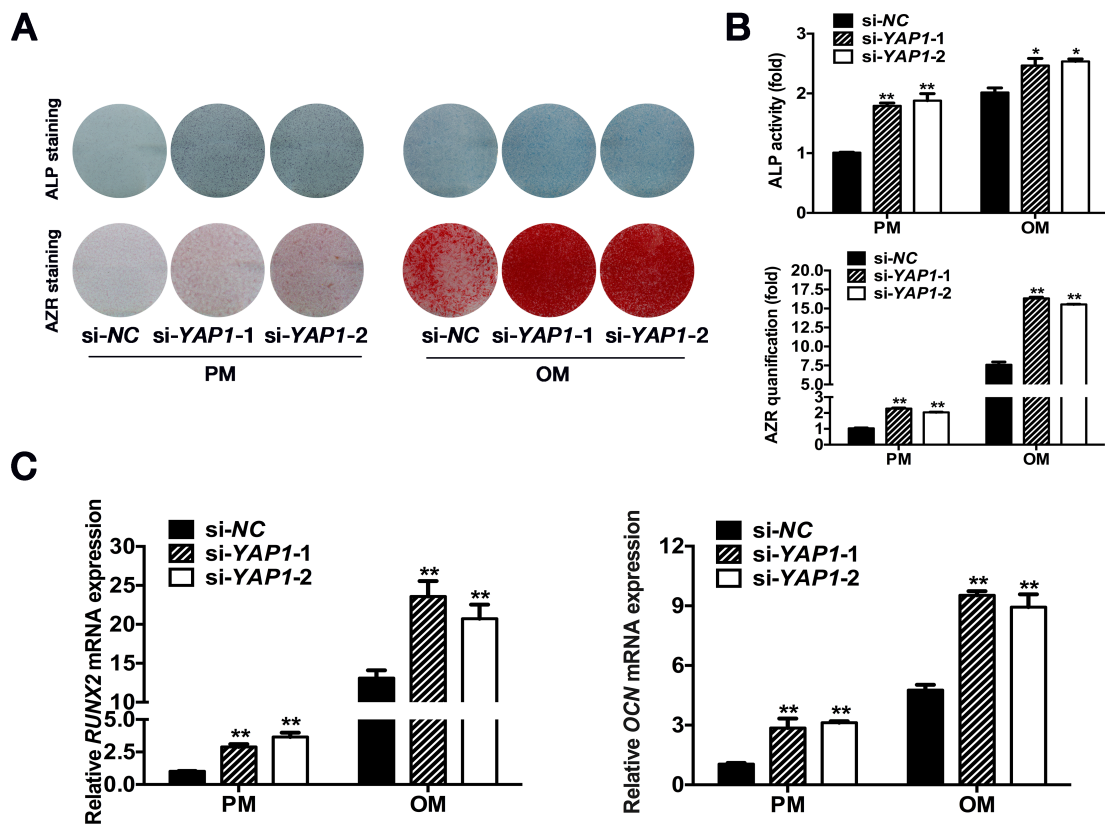

Figure S5 (related to main figure 7). Knockdown of *YAP1* enhanced the osteogenic differentiation of hASCs. (A) Alkaline phosphatase (ALP) staining on day 7 and Alizarin Red S (ARS) staining on day 14 after osteogenic induction. (B) ALP activity on day 7 and ARS mineralization assay on day 14 after osteogenic induction. (C) Relative mRNA levels of *RUNX2* and *OCN* as determined by qRT-PCR on day 14 of osteogenic induction. *GAPDH* was used for normalization. Data are represented as mean  $\pm$  SD; \* $p < 0.05$ , \*\* $p < 0.01$  ( $n = 3$  independent experiments).

### Supplemental Tables

**Table S1.** Gene expression in the osteogenic differentiation of hASCs transfected with miR-375 by microarray analysis ( $p < 0.001$ ).

| Upregulation   |             | Downregulation       |               |
|----------------|-------------|----------------------|---------------|
| Gene Name      | Fold Change | Gene Name            | Fold Change   |
| <i>MMP1</i>    | 8.0583      | <b><i>DEPTOR</i></b> | <b>0.3794</b> |
| <i>MMP3</i>    | 5.8323      | <i>ERG1</i>          | 0.399         |
| <i>COL10A2</i> | 3.633       | <i>MGARP</i>         | 0.404         |
| <i>PARRES2</i> | 2.6751      | <i>CTSC</i>          | 0.4061        |
| <i>ADRA2A</i>  | 2.5316      | <i>MEST</i>          | 0.4194        |
| <i>CXCL5</i>   | 2.391       | <i>FRZB</i>          | 0.4449        |
| <i>COL10A1</i> | 2.2842      | <i>INMT</i>          | 0.4455        |
| <i>AKR1C1</i>  | 2.2155      | <i>SERPINB2</i>      | 0.4468        |
| <i>CD163</i>   | 2.1417      | <i>FHL1</i>          | 0.4661        |
| <i>G0S2</i>    | 2.0636      | <i>HSPB7</i>         | 0.4697        |
|                |             | <i>FAM43A</i>        | 0.4709        |
|                |             | <i>EFHD1</i>         | 0.473         |
|                |             | <i>KPTAP1-5</i>      | 0.4809        |
|                |             | <i>ELN</i>           | 0.4836        |

Table 1 shows the fold changes of gene expression:  $\geq 2$  indicates upregulation and  $\leq 0.5$  indicates downregulation. ***DEPTOR*** decreased most among the downregulated genes with miR-375 overexpression in hASCs.

**Table S2.** Sequences of RNA and DNA oligonucleotides.

| Name                         | Sense Strand/Sense Primer (5'-3')            | Antisense Strand/Antisense Primer (5'-3') |
|------------------------------|----------------------------------------------|-------------------------------------------|
| <b>siRNA</b>                 |                                              |                                           |
| <i>DEPTOR1</i>               | GUCAUCAUCUCAAGACCUATT                        | UAGGUCUUGAGAUGAUGACTT                     |
| <i>DEPTOR2</i>               | GUCUGUCAGUUUGUCGUCUTT                        | AGACGACAAACUGACAGACTT                     |
| <i>YAPI-1</i>                | GGUGAUACUAUCAACCAAATT                        | UUUGGUUGAUAGUAUCACCTT                     |
| <i>YAPI-2</i>                | GACGACCAAUAGCUCAGAUTT                        | AUCUGAGCUAUUGGUCGUCTT                     |
| <i>NC</i>                    | UUCUCCGAACGUGUCACGUTT                        | ACGUGACACGUUCGGAGAATT                     |
| <b>Primers for qRT-PCR</b>   |                                              |                                           |
| miR-375 RT primer            | GCTGTCAACGATACGCTACCTAACGGCATGACAGTGTCAGCCTA |                                           |
| miR-375                      | GTGCAGGGTCCGAGGT                             | AGCCGTTTGTTCGTTCCGGCT                     |
| U6                           | CTCGCTTCGGCAGCACA                            | AACGCTTCACGAATTTGCGT                      |
| <i>RUNX2</i>                 | CCGCCTCAGTGATTTAGGGC                         | GGGTCTGTAATCTGACTCTGTCC                   |
| <i>ALP</i>                   | ATGGGATGGGTGTCTCCACA                         | CCACGAAGGGGAAGTTGTC                       |
| <i>OSX</i>                   | CCTCTGCGGGACTCAACAAC                         | TAAAGGGGCTGGATAAGCAT                      |
| <i>OCN</i>                   | CACTCCTCGCCCTATTGGC                          | CCCTCCTGCTTGGACACAAAG                     |
| <i>DEPTOR</i>                | TTTGTGGTGCAGGAAGTAA                          | CATTGCTTTGTGTCATTCTGG                     |
| <i>YAPI</i>                  | ACCCTCGTTTTGCCATGAAC                         | TTGTTCAACCGCAGTCTCTC                      |
| <i>GAPDH</i>                 | GAAGGTGAAGGTCGGAGTC                          | GAAGATGGTGATGGGATTC                       |
| <b>Primers for ChIP-qPCR</b> |                                              |                                           |
| <i>Ch-1</i>                  | CCAGTAGCACTACATTTGGGTAA                      | CTGTGGCAGCCATGACATTC                      |
| <i>Ch-2</i>                  | CGTGGGCAACATAGCAAGAC                         | GCACCTCAGCCTCAAAGTAA                      |
| <i>Ch-3</i>                  | GGTGCCGTACTTCCGCCAATT                        | CTCCTCCAACCTTTCTTCTCCTCTTC                |
| <i>Ch-4</i>                  | GTGGTGCCACTTCCCTACCGA                        | CCCTGCCATCCTTCCCTCT                       |
| <i>Ch-5</i>                  | GGTCGAGGTCACCACTGGATT                        | AGGGAGGAGCCGAGAAGCA                       |

Abbreviation: *DEPTOR*, dep-domain containing mTOR-interacting protein; *YAPI*, Yes-associated protein 1. *RUNX2*, runt-related transcription factor 2; *ALP*, alkaline phosphatase; *OSX*, osterix; *OCN*, osteocalcin.
